# Supplementary material for: Effectiveness of a community-based intervention for people with schizophrenia and their caregivers in India (COPSI): a randomised controlled trial
Source: PubMed Central journal article supplement — Lancet. 2014 Apr 19;383(9926):1385–94. doi: 10.1016/S0140-6736(13)62629-X (PMC4255067; doi:10.1016/s0140-6736(13)62629-x), 2014-04-19

# THE LANCET

## Supplementary appendix

This appendix formed part of the original submission and has been peer reviewed. We post it as supplied by the authors.

Supplement to: Chatterjee S, Naik S, John S, et al. Effectiveness of a community-based intervention for people with schizophrenia and their caregivers in India (COPSI): a randomised controlled trial. *Lancet* 2014; published online March 5. [http://dx.doi.org/10.1016/S0140-6736\(13\)62629-X](http://dx.doi.org/10.1016/S0140-6736(13)62629-X).

**This online appendix has been corrected. The corrected version first appeared at [thelancet.com](http://thelancet.com) on June 13, 2014**

**Online Table A. Association of complete/almost complete adherence with intervention arm**

|                    | <b>CBCC arm</b> | <b>FBC arm</b> | <b>Adjusted OR (95%CI)</b> | <b>P-value</b> |
|--------------------|-----------------|----------------|----------------------------|----------------|
| <b>Participant</b> |                 |                |                            |                |
| <b>Baseline</b>    | 108/163 (66%)   | 61/85 (72%)    | 1                          |                |
| <b>6 months</b>    | 142/162 (88%)   | 61/83 (73%)    | 3.11 (1.49-6.48)           | 0.002          |
| <b>12 months</b>   | 146/164 (89%)   | 64/84 (76%)    | 2.93 (1.34-6.39)           | 0.01           |
|                    |                 |                |                            |                |
| <b>Caregiver</b>   |                 |                |                            |                |
| <b>Baseline</b>    | 107/166 (64%)   | 57/85 (67%)    | 1                          |                |
| <b>6 months</b>    | 148/165 (90%)   | 65/83 (78%)    | 2.75 (1.28-5.96)           | 0.01           |
| <b>12 months</b>   | 143/163 (88%)   | 64/83 (77%)    | 2.27 (1.10-4.69)           | 0.03           |

**Online Table B. Intervention and service costs by group and site.**

|                                  | FBC                |                    |                    |                    | CCBC                   |                      |                        |                      |
|----------------------------------|--------------------|--------------------|--------------------|--------------------|------------------------|----------------------|------------------------|----------------------|
| Cost component                   | Whole sample       | Tamil Nadu         | Goa                | Satara             | Whole sample           | Tamil Nadu           | Goa                    | Satara               |
| Number of sessions with patients | -                  | -                  | -                  | -                  | 17.1 (6.9)             | 16.6 (4.9)           | 20.6 (8.3)             | 14.1 (5.6)           |
| Travel time (hours)              | -                  | -                  | -                  | -                  | 35.0 (28.3)            | 51.9 (30.8)          | 30.1 (23.8)            | 19.3 (15.8)          |
| Cost of sessions                 | -                  | -                  | -                  | -                  | 1209 (524)             | 1195 (408)           | 1434 (627)             | 990 (435)            |
| Cost of travel                   | -                  | -                  | -                  | -                  | 2135 (1726)            | 3169 (1884)          | 1839 (1453)            | 1178 (964)           |
| Cost of supervision              | -                  | -                  | -                  | -                  | 3481 (1396)            | 3386 (1002)          | 4181 (1690)            | 2859 (1138)          |
| Total intervention cost          | -                  | -                  | -                  | -                  | 6825 (3001)            | 7750 (2658)          | 7454 (3315)            | 5027 (2200)          |
| Other service costs              | 5685 (6500)        | 4864 (8981)        | 5892 (5033)        | 6451 (4030)        | 8163 (16,876)          | 4237 (5922)          | 14,804 (27,762)        | 6184 (6068)          |
| <b>Total costs</b>               | <b>5685 (6500)</b> | <b>4864 (8981)</b> | <b>5892 (5033)</b> | <b>6451 (4030)</b> | <b>15,250 (17,179)</b> | <b>12,242 (6108)</b> | <b>22,636 (27,901)</b> | <b>11,393 (6779)</b> |

<sup>1</sup> Costs are measured in Indian Rupees

### **Box 1. Components of the COPSI CCBC intervention**

- Structured needs assessments at enrolment and, every three months thereafter, to develop matched individualized treatment plans
- Structured clinical reviews by treating team and supervision for CHWs
- Psycho-educational information for both participants and caregivers
- Adherence management strategies
- Health promotion strategies to address physical health problems in participants
- Individualized rehabilitation strategies to improve the personal, social and work functioning of participants
- Specific efforts with participants and caregivers to deal with experiences of stigma and discrimination
- Linkage to self-help groups and other methods of user led support
- Networks with community agencies to address social problems, to facilitate social inclusion, access to legal benefits and employment opportunities

## References

1. Lund C, DSM, Plagerson S, et al. Poverty and mental disorders: breaking the cycle in low-income and middle-income countries. *Lancet* 2011; ; **378**: : 1502–14.
2. Thornicroft G, BE, Rose D et al. Global pattern of experienced and anticipated discrimination against people with schizophrenia: a cross-sectional survey. *Lancet* 2009; **373**: 408-15.
3. Collins PY, PV, Joestl SS, et al. Grand challenges in global mental health. *Nature*. 2011; **475**: 27-30.
4. Chatterjee S, Pillai A, Jain S, Cohen A, Patel V. Outcomes of people with psychotic disorders in a community-based rehabilitation programme in rural India. *Br J Psychiatry*. 2009; **195**(5): 433-9.
5. Chatterjee S, Leese M, Koschorke M, McCrone P, Naik S, John S, et al. Collaborative community based care for people and their families living with schizophrenia in India: protocol for a randomised controlled trial. *Trials*. 2011; **12**: 12.
6. Haro JM, Kamat SA, Ochoa S. The Clinical Global Impression-Schizophrenia Scale: a simple instrument to measure the diversity of symptoms present in schizophrenia. *Acta Psychiatr Scand*. 2003; **107**(Suppl (416)): 16-23.
7. Balaji M, CS, Koschorke M, et al. The development of a lay health worker delivered collaborative community based intervention for people with schizophrenia in India. *BMC Health Services Research* 2012,; **12**:42.
8. Kay SR, Fiszbein A, Opler LA. The positive and negative syndrome scale (PANSS) for schizophrenia. *Schizophr Bull*. 1987; **13**(2): 261-76.
9. Thara R. Indian Disability Evaluation and Assessment Scale; 2002.
10. Chaudhury PK, Deka K, Chetia D. Disability associated with mental disorders. *Indian J Psychiatry*. 2006; **48**(2): 95-101.
11. Brohan E, Clement S, Rose D, Sartorius N, Slade M, Thornicroft G. Development and psychometric evaluation of the Discrimination and Stigma Scale (DISC). *Psychiatry Research*. 2013; **208**(1): 33-40.
12. Ritsher JB, Otilingam PG, Grajales M. Internalized stigma of mental illness: psychometric properties of a new measure. *Psychiatry Res*. 2003; **121**(1): 31-49.
13. Hamilton S, Pinfold V, Rose D, Henderson C, Lewis-Holmes E, Flach C, et al. The effect of disclosure of mental illness by interviewers on reports of discrimination experienced by service users: a randomized study. *Int Rev Psychiatry*. 2011; **23**(1): 47-54.
14. Brohan E, Henderson C, Little K, Thornicroft G. Employees with mental health problems: Survey of U.K. employers' knowledge, attitudes and workplace practices. *Epidemiol Psychiatr Soc*. 2010; **19**(4): 326-32.
15. Sartorius N, Gulbinat W, Harrison G, Laska E, Siegel C. Long-term follow-up of schizophrenia in 16 countries. A description of the International Study of Schizophrenia conducted by the World Health Organization. *Social Psychiatry and Psychiatric Epidemiology*. 1996; **31**(5): 249-58.
16. Chisholm D, Sekar K, Kumar KK, Saeed K, James S, Mubbashar M, et al. Integration of mental health care into primary care. Demonstration cost-outcome study in India and Pakistan. *Br J Psychiatry*. 2000; **176**: 581-8.
17. Chatterjee S, Patel V, Chatterjee A, Weiss HA. Evaluation of a community-based rehabilitation model for chronic schizophrenia in rural India. *Br J Psychiatry*. 2003; **182**: 57-62.
18. Adams G, Gulliford MC, Ukoumunne OC, Eldridge S, Chinn S, Campbell MJ. Patterns of intra-cluster correlation from primary care research to inform study design and analysis. *J Clin Epidemiol*. 2004; **57**(8): 785-94.

19. Roberts C, Roberts SA. Design and analysis of clinical trials with clustering effects due to treatment. *ClinTrials*. 2005; **2**(2): 152-62.
20. Boutron I, Moher D, Altman DG, Schulz KF, Ravaud P. Extending the CONSORT statement to randomized trials of nonpharmacologic treatment: explanation and elaboration. *Ann Intern Med*. 2008; **148**(4): 295-309.
21. Hackshaw A, Kirkwood A. Interpreting and reporting clinical trials with results of borderline significance. *BMJ*. 2011; **343**: d3340.
22. Schulz KF, Altman DG, Moher D. CONSORT 2010 statement: updated guidelines for reporting parallel group randomised trials. *PLoS Med*. 2010; **7**(3): e1000251.
23. Thornicroft G, Wykes T, Holloway F, Johnson S, Szmulker G. From efficacy to effectiveness in community mental health services. *PRiSM Psychosis Study*. 10. *BrJPsychiatry*. 1998; **173**: 423-7.
24. Kulhara P CS, Avasthi A, et al. Psychoeducational intervention for caregivers of Indian patients with schizophrenia: a randomised-controlled trial. *Acta Psychiatr Scand* 2009;; **119**:: 472-83.
25. Parantahaman V KS, Lim J-L, Singh HSS et al. Effective implementation of a structured psychoeducation programme among caregivers of patients with schizophrenia in the community. *Asian Journal of Psychiatry*,. 2010; **Vol: 3**:: 206-12.
26. Sharif F SMA. Effect of a psycho-educational intervention for family members on caregiver burdens and psychiatric symptoms in patients with schizophrenia in Shiraz, Iran. *BMC Psychiatry*,. 2012; **12**::48.
27. Farooq S NZ, Irfan M, et al. : . Schizophrenia medication adherence in a resource poor setting: randomised controlled trial of supervised treatments for out- patients for schizophrenia (STOPS). *British Journal of Psychiatry* 2011.; **199**: 467-72
28. Thornicroft G, Tansella M. The balanced care model for global mental health. *Psychol Med*. 2013; **43**(4): 849-63.
29. Dua T BC, Clark N, Fleischmann A, Poznyak V, et al. Evidence-Based Guidelines for Mental, Neurological, and Substance Use Disorders in Low- and Middle-Income Countries: Summary of WHO Recommendations.. *PLoS Med*. 2011; **8**(11): **e1001122**. **doi:10.1371/journal.pmed.1001122**.
30. Gaebel W, Becker T, Janssen B, Munk-Jorgensen P, Musalek M, Rossler W, et al. EPA guidance on the quality of mental health services. *Eur Psychiatry*. 2012; **27**(2): 87-113.

Figure 2. Total PANSS and IDEAS scores over time and across study arms

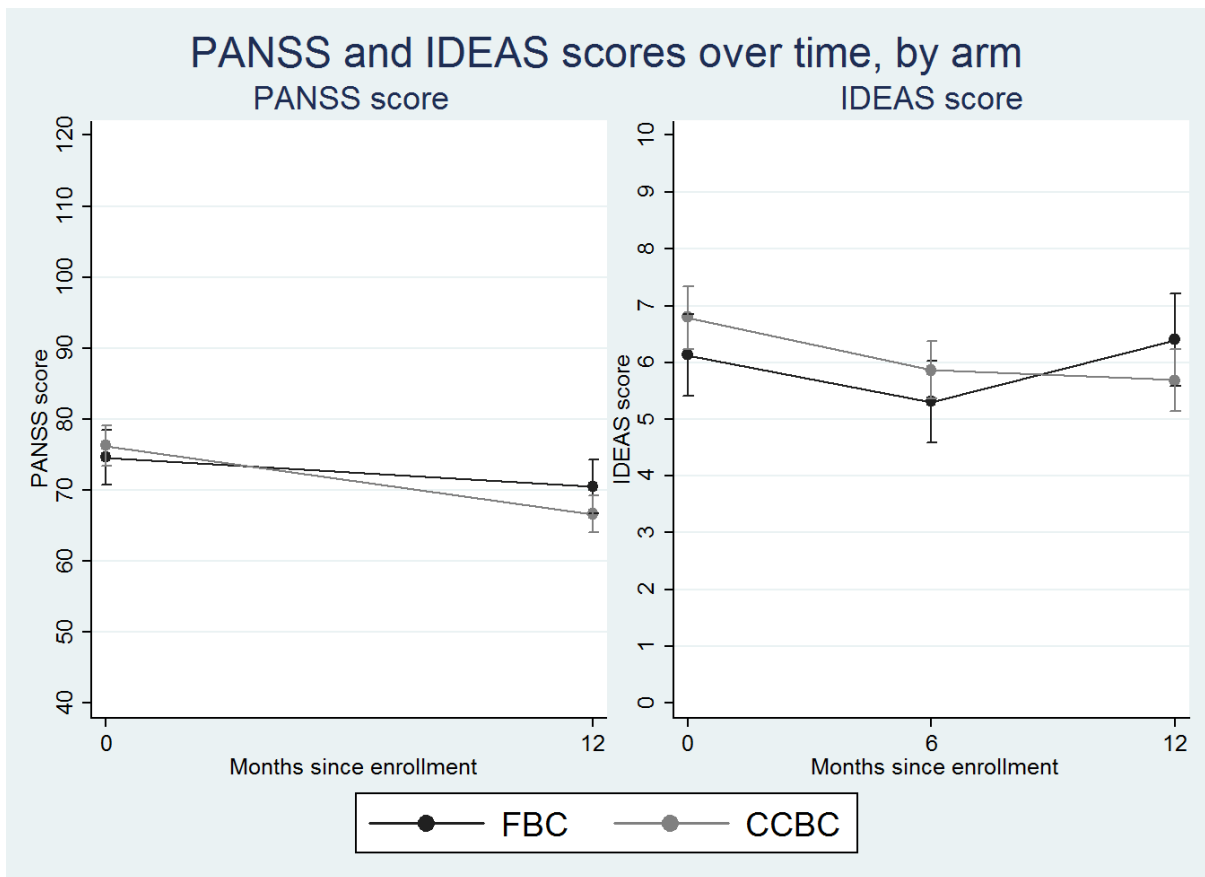

Supplement: mmc1.pdf [file mmc1.pdf]
